# Supplementary material
Source: publisher figshare collection journal article supplement (https://karger.figshare.com/ndownloader/files/18107447)
Supplement: Supplementary file 1 [file 18107447]

**Supplementary table 2.** Spearman rank correlation of between maternal leptin levels and maternal and infant variables. Abbreviations: Birth weight standard deviation score (BWSDS). Bold text indicates significant association.

| **Variable** | **n** | **Spearman’s Rho** | **p-value** |
| --- | --- | --- | --- |
| Maternal age | 739 | - 0.062 | 0.092 |
| Maternal BMI at enrollment | 740 | **0.769** | **0.001** |
| Maternal weight gain | 483 | - 0.081 | 0.076 |
| BWSDS | 739 | **0.132** | **0.001** |
| Fetal ponderal index | 515 | **0.109** | **0.013** |
